# Supplementary material for: YtfK activates the stringent response by triggering the alarmone synthetase SpoT in Escherichia coli
Source: PubMed Central journal article supplement (PMC6917717; doi:10.1038/s41467-019-13764-4), 2019-12-17
Supplement: 41467_2019_13764_MOESM3_ESM.pdf [file 41467_2019_13764_MOESM3_ESM.pdf]

## **Description of Additional Supplementary Files**

File Name: Supplementary Data 1

Description: List and description of plasmids used in this work.

File Name: Supplementary Data 2

Description: List of DNA oligonucleotides used in this work.
